# Supplementary material for: An efficient and reusable ionic liquid catalyst for the synthesis of 14-aryl-14H-dibenzo[a,j]xanthenes under solvent-free conditions
Source: Royal Society of Chemistry journal article supplement (doi:10.1039/c4ra06521b), 2014-01-01

## Supporting information

### An efficient and reusable ionic liquid catalyst for the synthesis of 14-aryl-14H-dibenzo[a,j]xanthenes under solvent-free conditions

Anlian Zhu, Shukun Bai, Wei Jin, Ruixia Liu, Lingjun Li, Yang Zhao, Jianji Wang\*

School of Chemistry and Chemical Engineering, Collaborative Innovation Center of

Henan Province for Green Manufacturing of Fine Chemicals, Key Laboratory of

Green Chemical Media and Reactions, Ministry of Education, Henan Normal

University, Xinxiang, Henan 453007, P. R. China

Telephone: +86-0373-3325805; Fax: +86-0373-3329030

jwang@henannu.edu.cn

#### Part 1. NMR data for 14-aryl-14H-dibenzo[a,j]xanthenes

##### 3a. 14-(4-Nitro-phenyl)-14H-dibenzo[a,j]xanthene

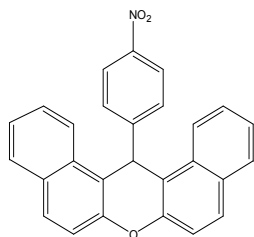

$^1\text{H}$  NMR (400 MHz,  $\text{CDCl}_3$ ): 6.61 (s, 1H), 7.42~7.46(t,  $J=8.0$  Hz, 2H), 7.50~7.52 (d,  $J=8.0$  Hz, 2H), 7.58~7.62(t,  $J=8.0$  Hz, 2H), 7.67~7.69 (d,  $J=8.0$  Hz, 2H), 7.83~7.87(m, 4H), 7.99~8.02(d,  $J=12.0$  Hz, 2H), 8.28~8.30(d,  $J=8.0$  Hz, 2H).

##### 3b. 14-Phenyl-14H-dibenzo[a,j]xanthene

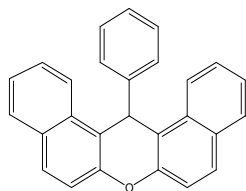

$^1\text{H}$  NMR (400 MHz,  $\text{CDCl}_3$ ): 6.49(s, 1H), 6.97~7.01 (t,  $J=8.0$  Hz, 1H), 7.13~7.17 (t,  $J=8.0$  Hz, 2H), 7.39-7.43 (t,  $J=8.0$  Hz, 2H), 7.48~7.60 (m, 6H), 7.78~7.84(m, 4H), 8.39~8.41 (d,  $J=8.0$  Hz, 2H).

**3c.** 14-(3-Nitro-phenyl)-14H-dibenzo[a,j]xanthene

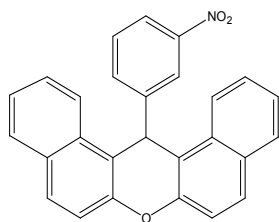

$^1\text{H}$  NMR (400 MHz,  $\text{CDCl}_3$ ): 6.60(s, 1H), 7.29~7.31(d,  $J=8.0$  Hz, 1H), 7.42~7.46 (t,  $J=8.0$  Hz, 2H), 7.50~7.52(d,  $J=8.0$  Hz, 2H), 7.59~7.63(t,  $J=8.0$  Hz, 2H), 7.80~7.86 (m, 6H), 8.29~8.31 (d,  $J=8.0$  Hz, 2H), 8.42(s, 1H).

**3d.** 14-(4-Hydroxyl-phenyl)-14H-dibenzo[a,j]xanthene

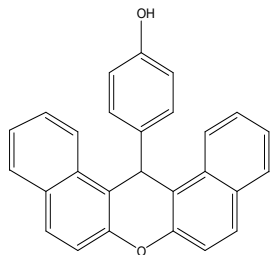

$^1\text{H}$  NMR (400 MHz,  $\text{CDCl}_3$ ): 6.56(s, 1H), 6.70~6.72 (d,  $J=8.0$  Hz, 2H), 7.48~7.55 (m, 4H), 7.58~7.60(d,  $J=8.0$  Hz, 2H), 7.68~7.71 (m, 3H), 7.89~7.96(dd,  $J=8.0$  Hz, 4H), 8.47~8.49 (d,  $J=8.0$  Hz, 2H).

**3e.** 14-(4-Methyl-phenyl)-14H-dibenzo[a,j]xanthene

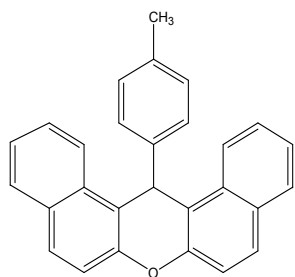

$^1\text{H}$  NMR (400 MHz,  $\text{CDCl}_3$ ): 2.13 (s, 3H), 6.46 (s, 1H), 6.94~6.96 (d,  $J = 8.0$  Hz, 2H), 7.38~7.42 (t,  $J = 8.0$  Hz, 4H), 7.47~7.49 (d,  $J = 8.0$  Hz, 2H), 7.55~7.59 (t,  $J = 8.0$  Hz, 2H), 7.77~7.83 (dd,  $J = 8.0$  Hz, 4H), 8.38~8.40 (d,  $J = 8.0$  Hz, 2H).

**3f.** 14-(4-Chloro-phenyl)-14H-dibenzo[a,j]xanthene

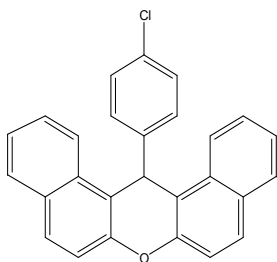

$^1\text{H}$  NMR (400 MHz,  $\text{CDCl}_3$ ): 6.47 (s, 1H), 7.10~7.12(d,  $J = 8.0$  Hz, 2H), 7.41~7.50 (m, 6H), 7.57-7.61(t,  $J = 8.0$  Hz, 2H), 7.79~7.85 (m, 4H), 8.31~8.33 (d,  $J = 8.0$  Hz, 2H).

**3g.** 14-(4-Bromo-phenyl)-14H-dibenzo[a,j]xanthene

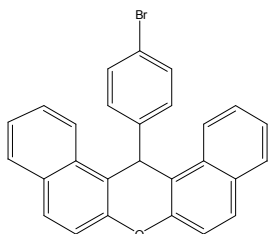

$^1\text{H}$  NMR (400 MHz,  $\text{CDCl}_3$ ): 6.46 (s, 1H), 7.25~7.27 (m, 2H), 7.38~7.49 (m, 6H), 7.56~7.60 (t,  $J = 8.0$  Hz, 2H), 7.79~7.85 (dd,  $J = 8.0$  Hz, 4H), 8.30~8.32 (d,  $J = 8.0$  Hz, 2H).

**3h.** 14-(4-Fluoro-phenyl)-14H-dibenzo[a,j]xanthene

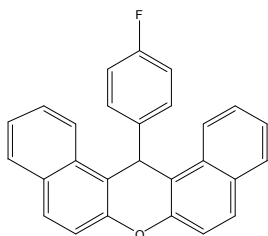

$^1\text{H}$  NMR (400 MHz,  $\text{CDCl}_3$ ): 6.47 (s, 1H), 6.79~6.84(m, 2H), 7.40~7.48 (m, 6H), 7.56-7.60(t,  $J = 8.0$  Hz, 2H), 7.78~7.84 (m, 4H), 8.32~8.34 (d,  $J = 8.0$  Hz, 2H).

**3i.** 14-(4-Methoxy-phenyl)-14H-dibenzo[a,j]xanthene

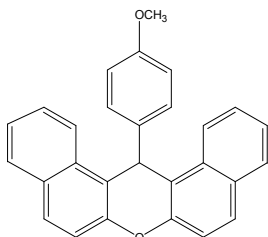

$^1\text{H}$  NMR (400 MHz,  $\text{CDCl}_3$ ): 3.61(s, 3H), 6.45(s, 1H), 6.66~6.68(d,  $J = 8.0$  Hz, 2H), 7.39~7.43 (m, 4H), 7.46~7.48 (d,  $J = 8.0$  Hz, 2H), 7.56~7.59 (m, 2H), 7.77~7.83 (dd,

$J = 8.0$  Hz, 2H), 8.37~8.39(d,  $J = 8.0$  Hz, 2H).

**3j.** 14-(3-Methoxy-4-hydroxyl-phenyl)-14H-dibenzo[*a,j*]xanthene

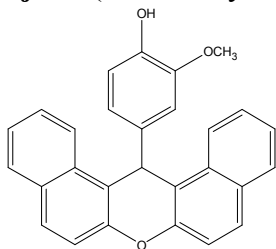

$^1\text{H}$  NMR (400 MHz,  $\text{CDCl}_3$ ): 3.66 (s, 3H), 6.44 (s, 1H), 6.71~6.73 (d,  $J = 8.0$  Hz, 1H), 6.84 (s, 1H), 7.14~7.16 (d,  $J = 8.0$  Hz, 1H), 7.40~7.49 (m, 4H), 7.56~7.60 (t,  $J = 8.0$  Hz, 2H), 7.78~7.84 (dd,  $J = 8.0$  Hz, 4H), 8.39~8.41 (d,  $J = 8.0$  Hz, 2H);  $^{13}\text{C}$  NMR:  $\delta$  37.59, 55.69, 110.72, 113.73, 121.01, 122.73, 124.26, 126.74, 128.77, 131.12, 131.46, 137.11, 144.12, 146.71, 148.73. HRMS (ESI) calcd for  $\text{C}_{28}\text{H}_{21}\text{O}_3^+$  405.1485, found: 405.1479 for  $[\text{M}+\text{H}]^+$ .

**3k.** 14-(4-Formyl-phenyl)-14H-dibenzo[*a,j*]xanthenes

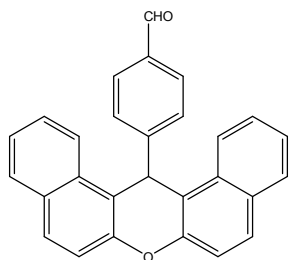

$^1\text{H}$  NMR (400 MHz,  $\text{CDCl}_3$ ): 6.58 (s, 1H), 7.41~7.44 (t,  $J = 6.0$  Hz, 2H), 7.49~7.52 (d,  $J = 12.0$  Hz, 2H), 7.57~7.61 (t,  $J = 8.0$  Hz, 2H), 7.65~7.71 (q,  $J = 8.0$  Hz, 4H), 7.81~7.85 (t,  $J = 8.0$  Hz, 4H), 8.32~8.34 (d,  $J = 8.0$  Hz, 2H), 9.79 (s, 1H);  $^{13}\text{C}$  NMR:  $\delta$  38.23, 116.23, 118.04, 122.26, 124.45, 127.03, 128.95, 128.87, 129.34, 130.04, 131.17, 131.07, 148.79, 191.26. HRMS (ESI) calcd for  $\text{C}_{28}\text{H}_{19}\text{O}_2^+$  387.1380, found 387.1377 for  $[\text{M}+\text{H}]^+$ .

Part 2.  $^1\text{H}$  NMR for intermediate **4a** and target compound **3a**

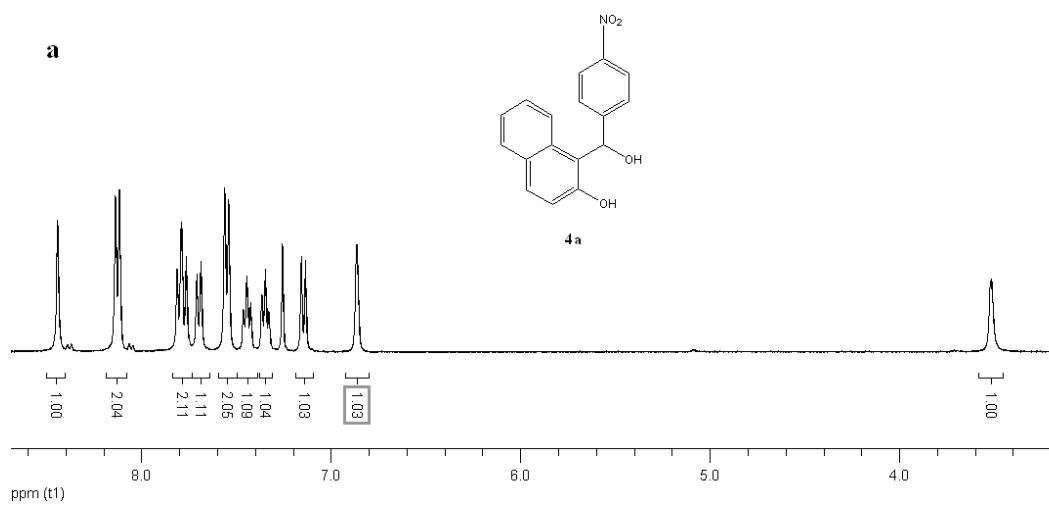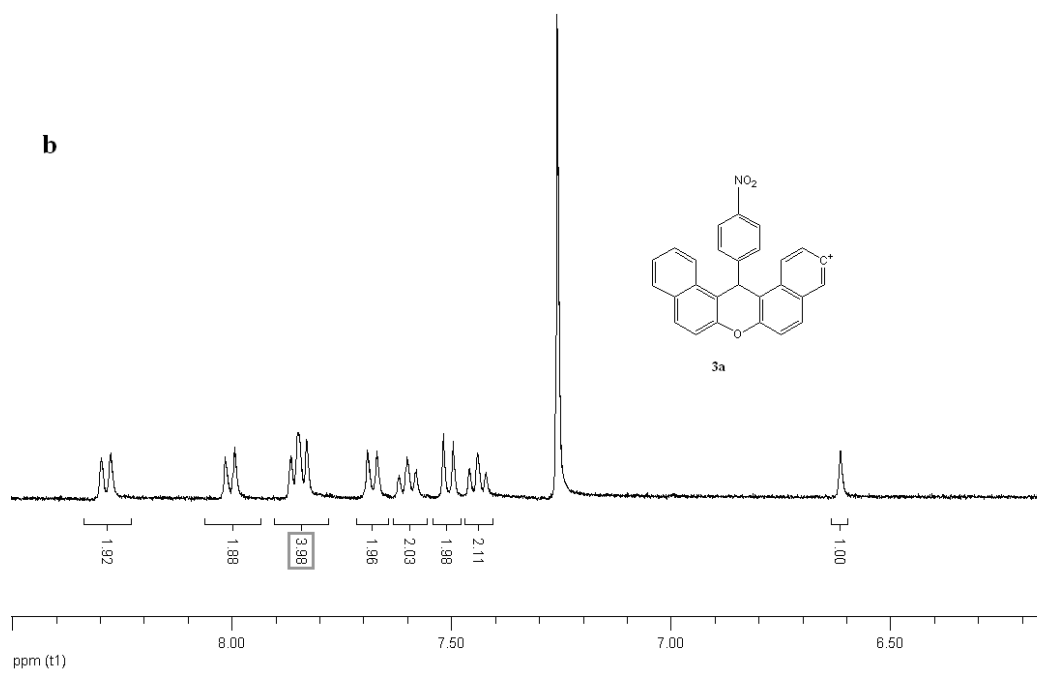

### Part 3. Selected NMR spectra for the 14-aryl-14H-dibenzo[a,j]xanthenes

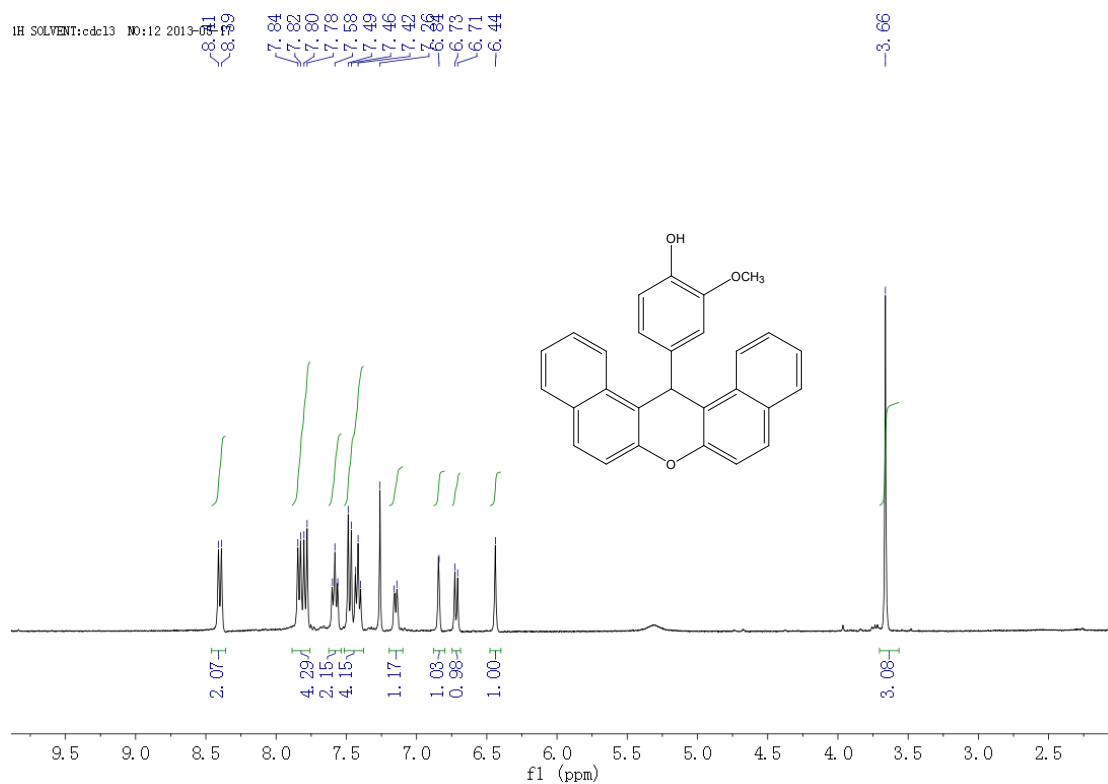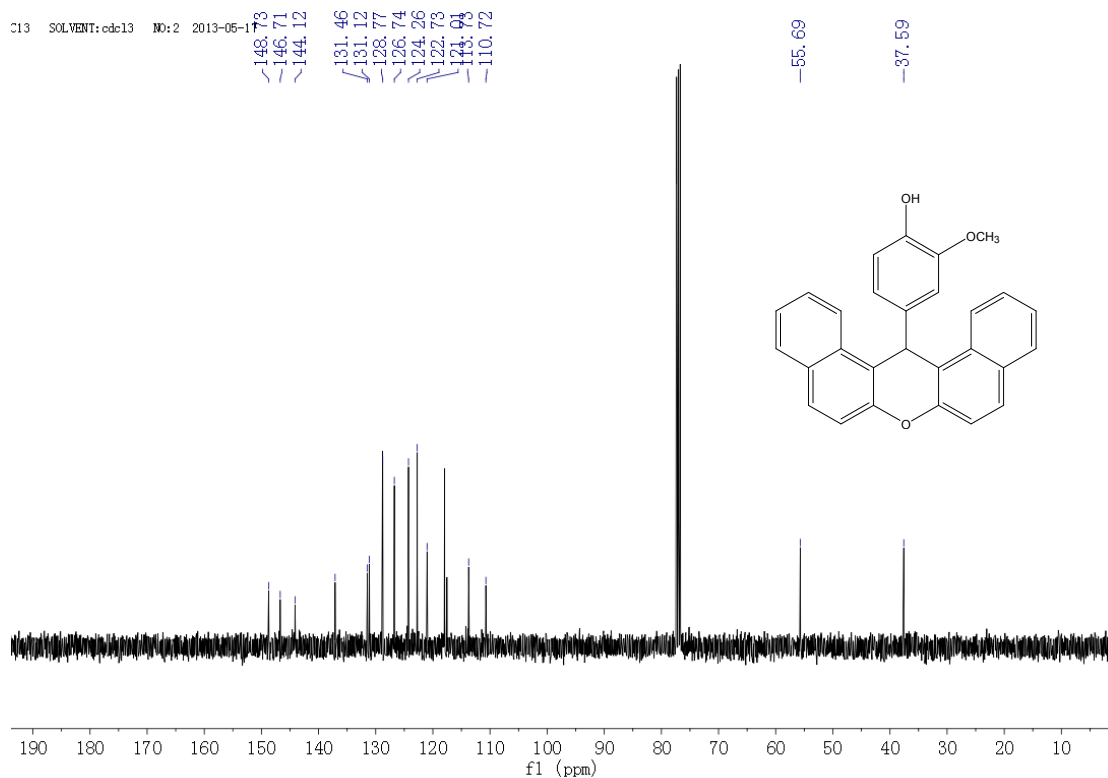

1H SOLVENT:cdcl3 NO:12 2013-05-23

9.79  
8.34  
8.32  
7.84  
7.81  
7.69  
7.67  
7.52  
7.49  
6.98

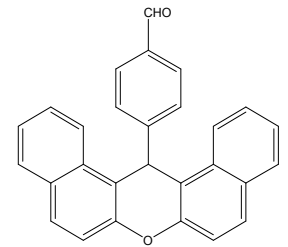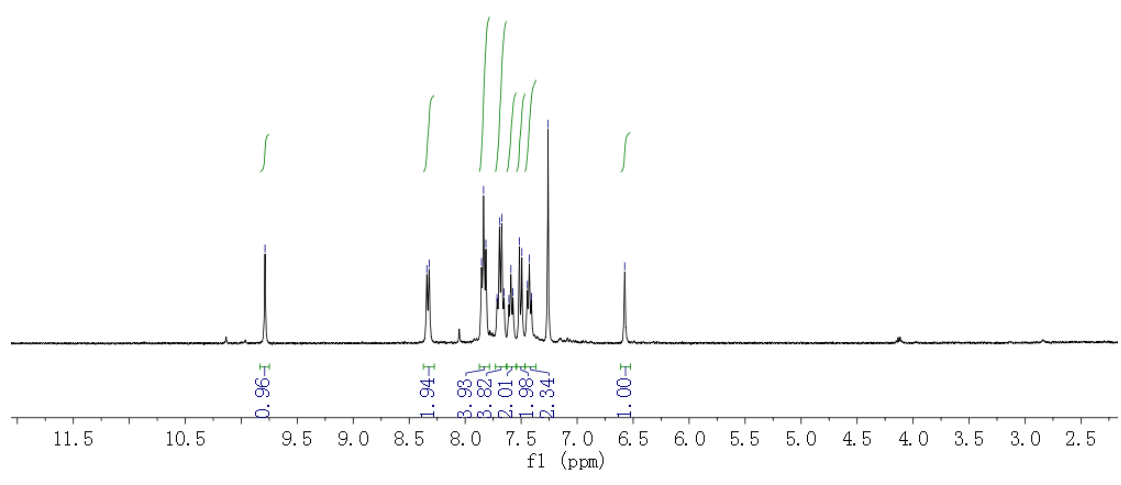

13 SOLVENT:cdcl3 NO:1 2013-05-23

148.10  
142.66  
135.29  
131.48  
131.10  
129.20  
128.80  
128.78  
128.12  
126.77  
124.22  
122.74  
118.02  
117.47

37.65  
20.91

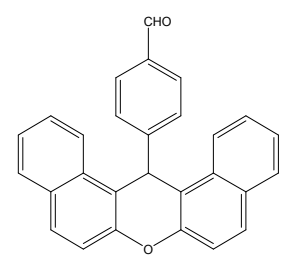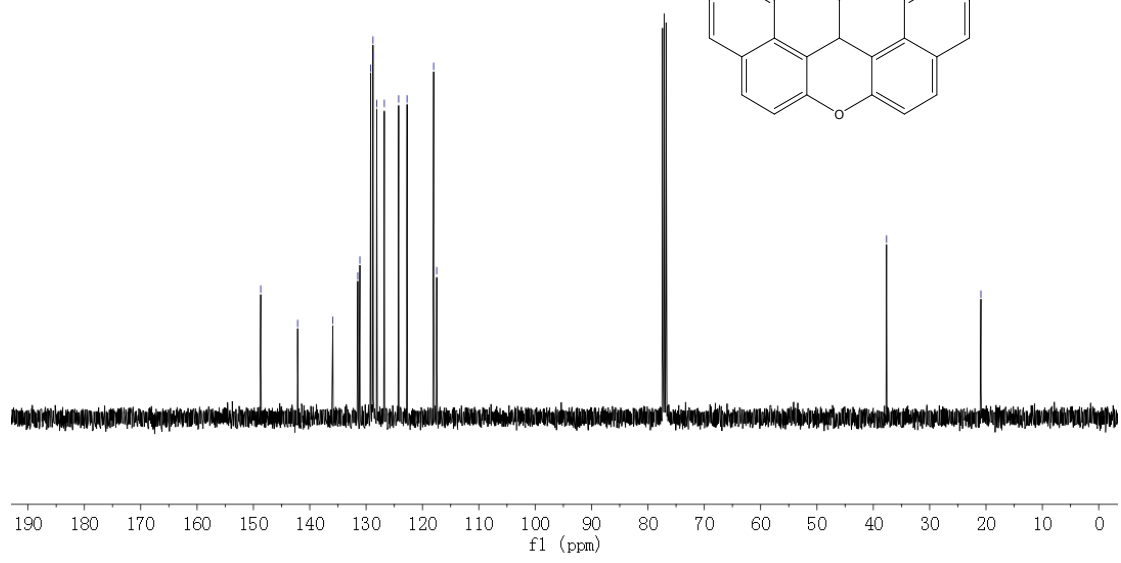

Supplement: c4ra06521b1.pdf [file c4ra06521b1.pdf]
